# Supplementary material for: Nickel nanoparticle chains inside carbonized polymer nanofibers: preparation by electrospinning and ion-beam irradiation
Source: Royal Society of Chemistry journal article supplement (doi:10.1039/c3nr02421k), 2013-01-01
Supplement: c3nr02421k.pdf [file c3nr02421k.pdf]

# Electronic Supplementary Information (ESI)

## Nickel Nanoparticle Chains Inside Carbonized Polymer Nanofibers: Preparation by Electrospinning and Ion-beam Irradiation

*Katsuya Sode,<sup>a,b</sup> Manabu Tanaka,<sup>a,b</sup> Yoshiaki Suzuki,<sup>b</sup> and Hiroyoshi Kawakami<sup>a,b\*</sup>*

<sup>a</sup> Department of Applied Chemistry, Tokyo Metropolitan University, Hachioji, Tokyo 192-0397, Japan

<sup>b</sup> The Institute of Physical and Chemical Research (RIKEN), Wako, Saitama 351-0198, Japan

e-mail: kawakami-hiroyoshi@tmu.ac.jp

## Supporting figures

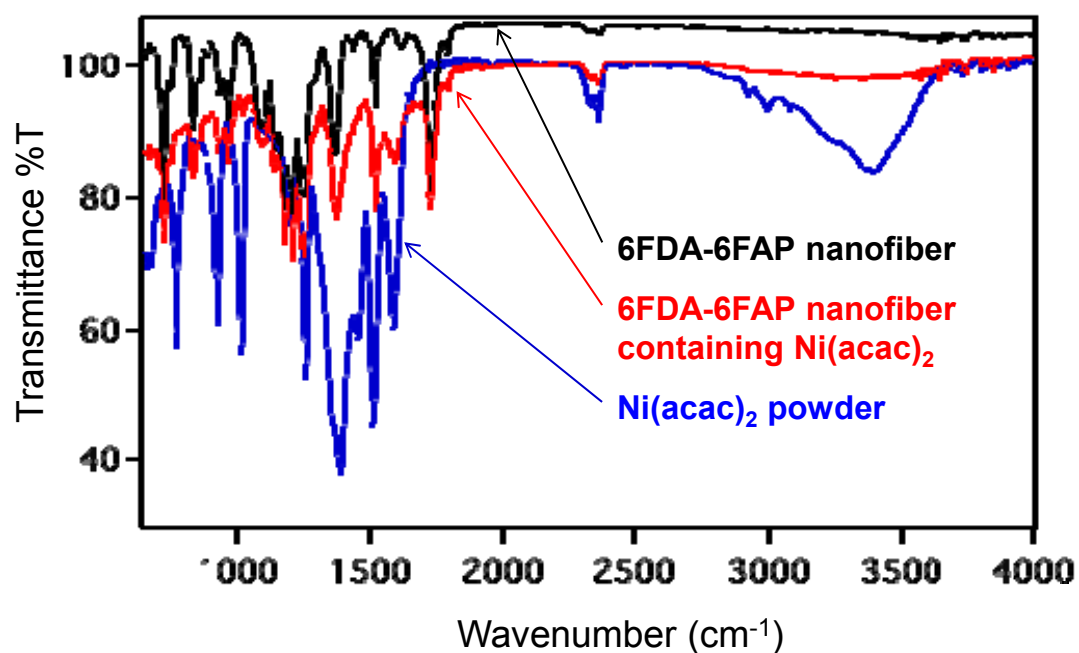

Fig. S1. FT-IR spectrum of 6FDA-6FAP nanofibers, 6FDA-6FAP nanofiber containing Ni(acac)<sub>2</sub>, and Ni(acac)<sub>2</sub> powder.

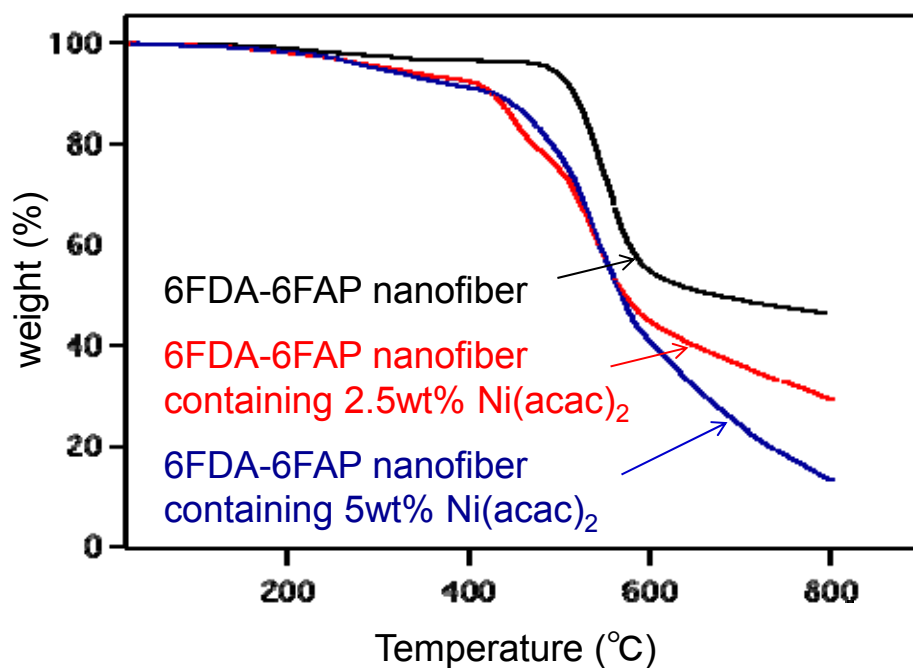

Fig. S2. TGA curve of 6FDA-6FAP nanofibers containing 0, 2.5, and 5wt% Ni(acac)<sub>2</sub>.

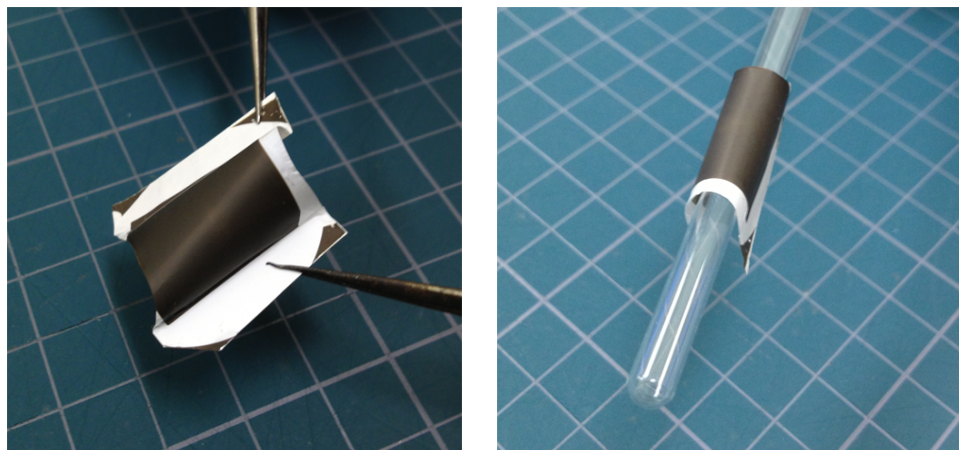

Fig. S3. Optical images of flexible electrospun 6FDA-6FAP nanofibrous membranes containing 5wt% Ni(acac)<sub>2</sub> after ion-beam irradiation.

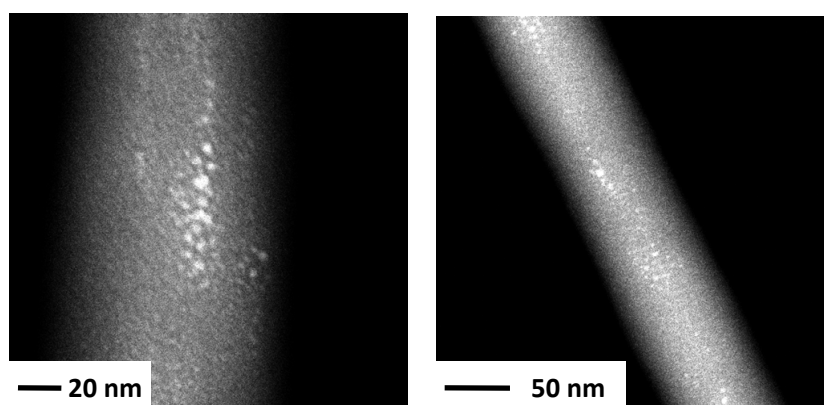

Fig. S4. STEM HAADF images of the ion-beam irradiated nanofibers with 5wt% Ni(acac)<sub>2</sub>.

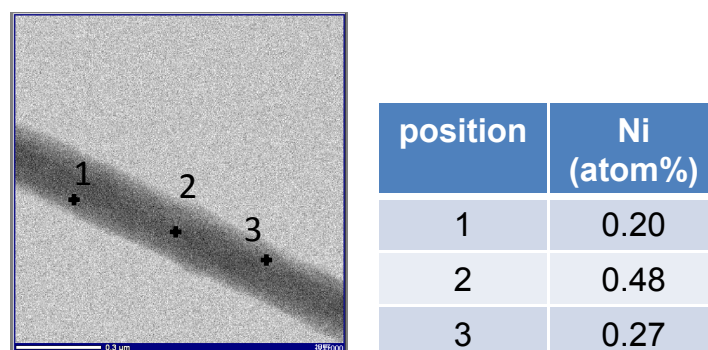

Fig. S5. Nickel contents at three different positions in a 6FDA-6FAP nanofiber containing 5wt% Ni(acac)<sub>2</sub> before ion-beam irradiation measured by EDX spectrometry.

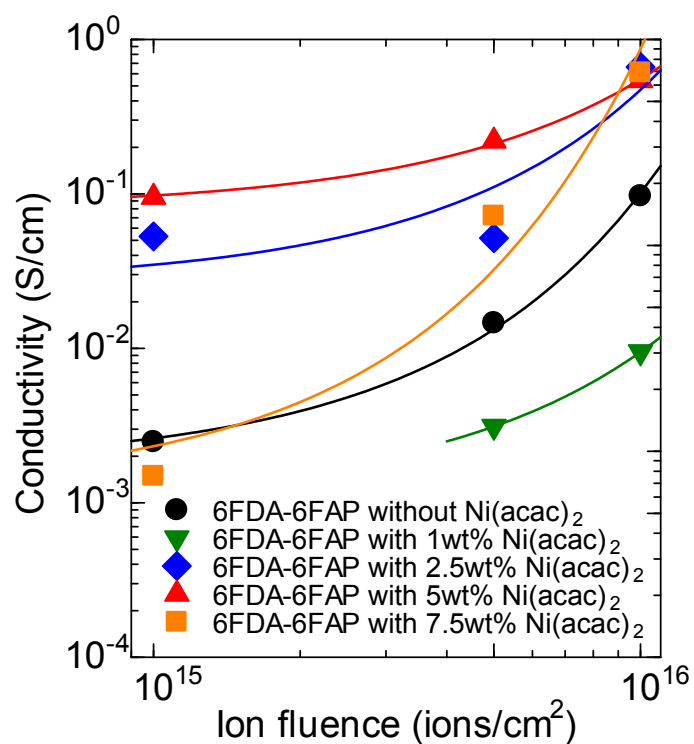

Fig. S6. Electrical conductivities of electrospun 6FDA-6FAP nanofibrous membranes containing various amount of Ni(acac)<sub>2</sub> after ion-beam irradiation.

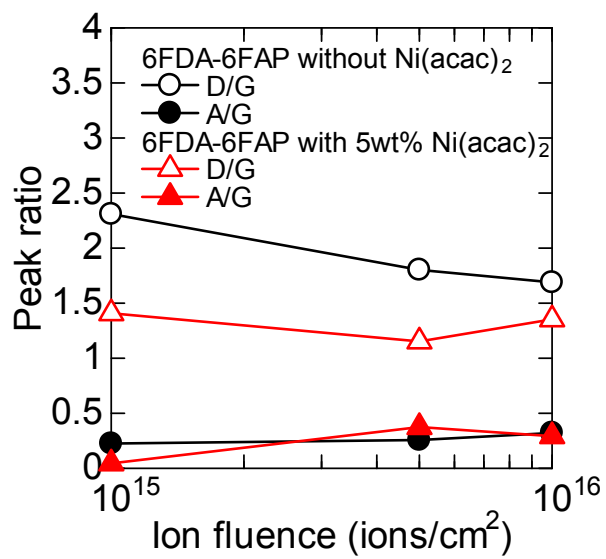

Fig. S7. D/G and A/G peak ratio of ion-beam irradiated 6FDA-6FAP nanofibrous membranes containing various amount of Ni(acac)<sub>2</sub> measured by Raman spectroscopy.
